# Supplementary material for: Highly efficient isocyanate-free microwave-assisted synthesis of [6]-oligourea
Source: Royal Society of Chemistry journal article supplement (doi:10.1039/c3cy00117b), 2013-01-01
Supplement: c3cy00117b.pdf [file c3cy00117b.pdf]

## Highly Efficient Isocyanate-Free Microwave-Assisted Synthesis of [6]-Oligourea

Abdussalam K. Qaroush,<sup>a</sup> Asmaa S. Al-Hamayda,<sup>b</sup> Yasmeen K. Khashman,<sup>b</sup> Sergei I. Vagin,<sup>a</sup> Carsten Troll<sup>a</sup> and Bernhard Rieger<sup>a\*</sup>

a. WACKER-Lehrstuhl für Makromolekulare Chemie, Technische Universität München, Lichtenbergstraße 4, 85747, Garching b. München, Germany.

b. Department of Chemical–Pharmaceutical Engineering, German-Jordanian University, P.O. Box 35247, Amman 11180, Jordan.

Corresponding Author's Email: [Rieger@tum.de](mailto:Rieger@tum.de)

### Electronic Supporting information (ESI)

#### [6]-Oligourea results

All products were white colored oligomers. The analytical data below is given for the following conditions: A 1:1 molar ratio of diamine: PC; 2.0 mL PC, 2.0 mol% TBD, 50 °C, 10 min, 200 W. In addition, the total oligomer's formula weight is accounted upon inclusion of both amine and urethane end groups after calculating the degree of polymerization from the <sup>1</sup>HNMR.

Two sets of methodologies were used to produce the title oligomer:

**Dynamic mode.**

Optimized conditions: 2.0 mol % TBD, 10 min, 50 °C and 200 W.

**Fixed power mode.**

Optimized conditions: 2.0 mol % TBD, 20 min, 10 W.

---

**Dynamic mode (Optimization experiments)**

*Optimized conditions: 2.0 mol % TBD, 10 min, 50 °C and 200 W.*

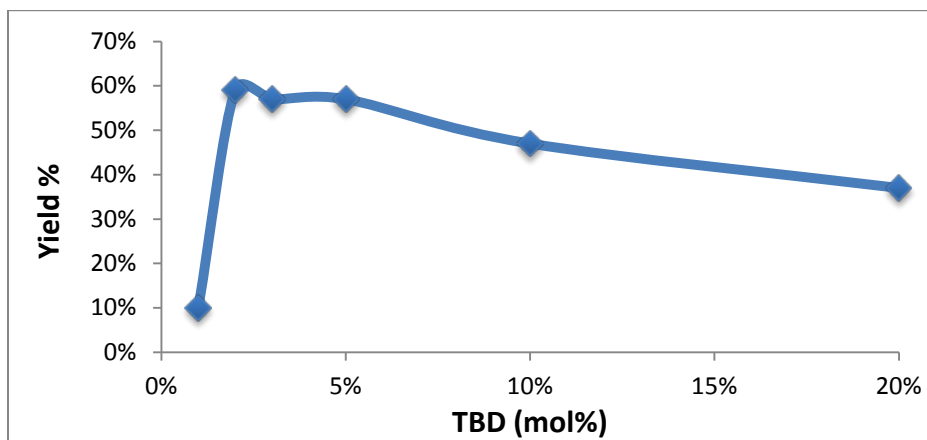

**S 1.** Yield as a function of catalyst loading (*mol %*); parameters used: TBD (*mol%*), 220W, 100 °C, 10 *min* and solvent-free conditions.

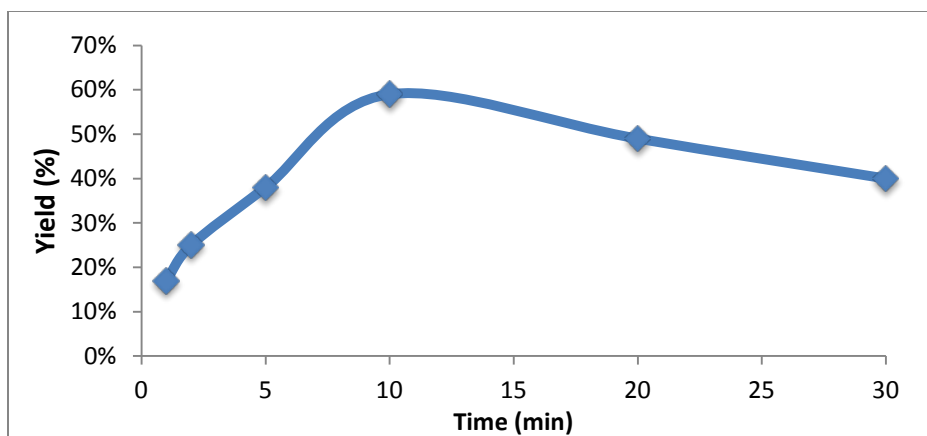

**S 2.** Yield as a function of time (*min*), parameters used: time (*min*), 3.1 mol% TBD, 220W, 100 °C and solvent-free conditions.

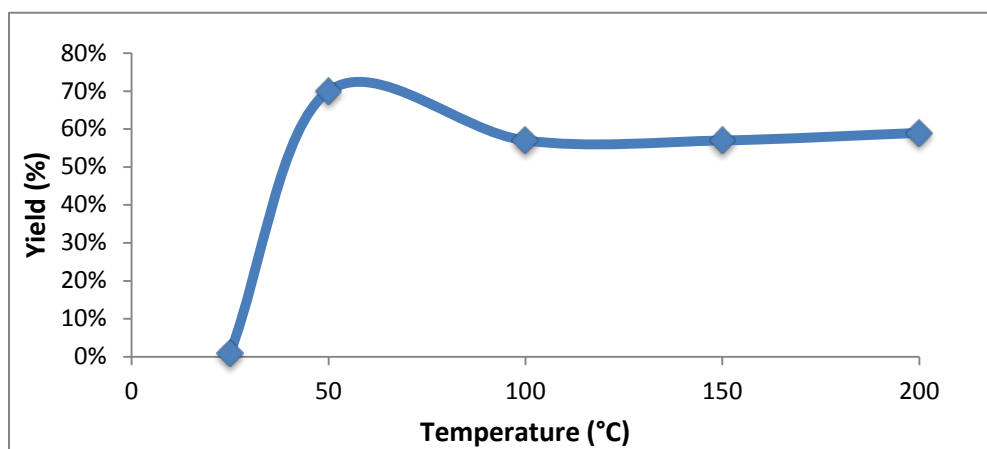

**S 3.** Yield as a function of temperature (°C), parameters used: Temp (°C), 3.1 mol% TBD, 220W, time 10 min and solvent-free conditions.

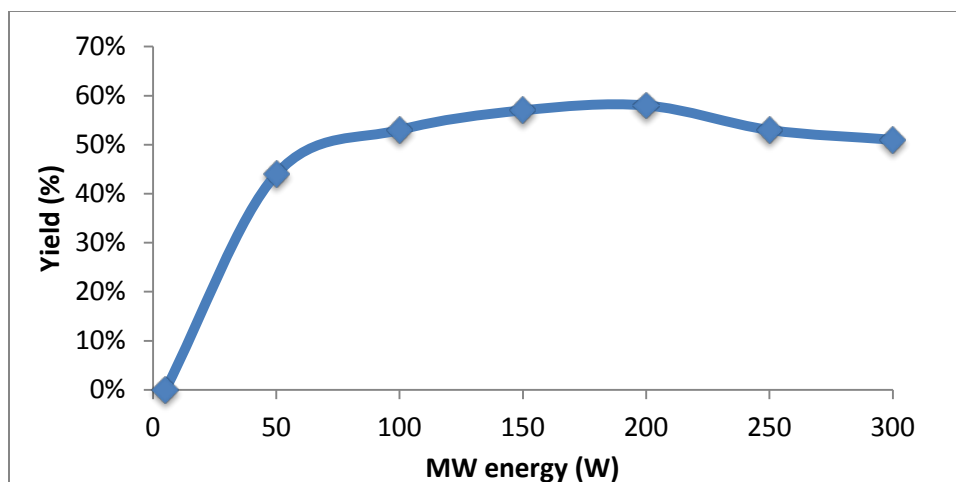

**S 4.** Yield as a function of MW energy (W)-Dynamic mode, parameters used: Microwave power 220 W, 3.1 mol% TBD, 100 °C, time 10 *min* and solvent-free conditions.

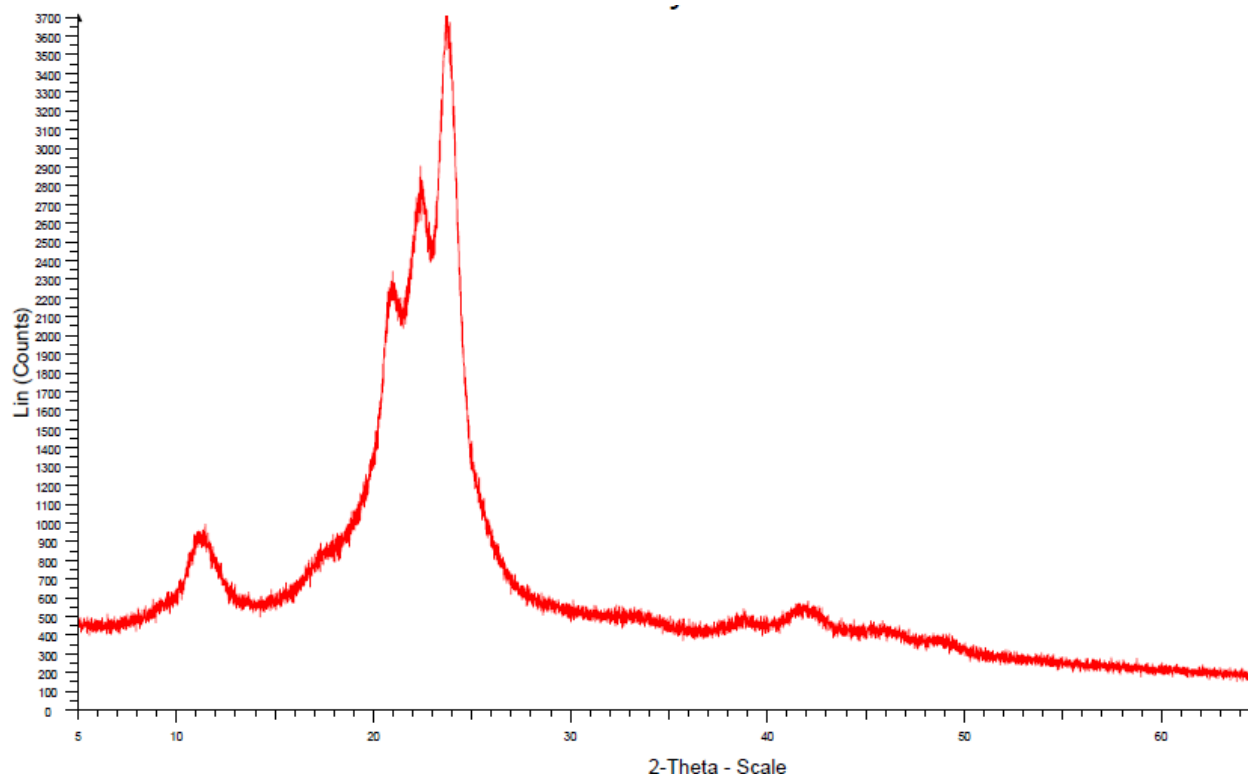

**S 5.** XRD pattern of the [6]-oligourea prepared in the study
